# Supplementary material
Source: Springer Nature journal article supplement (https://www.springermedizin.de/resource/supplementary/13099_2014_145_MOESM1_ESM.pdf/9665650)

# Figure S1

## Before trimming

## After trimming

### A

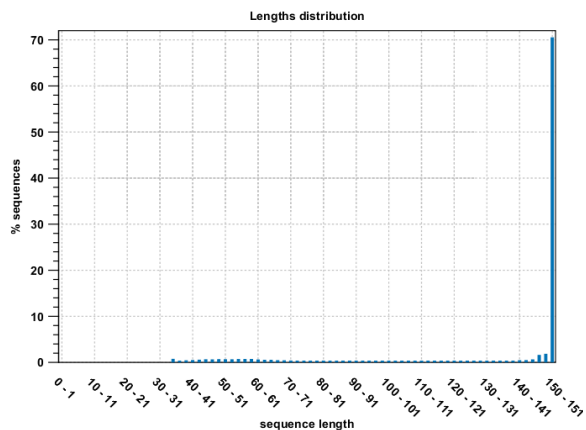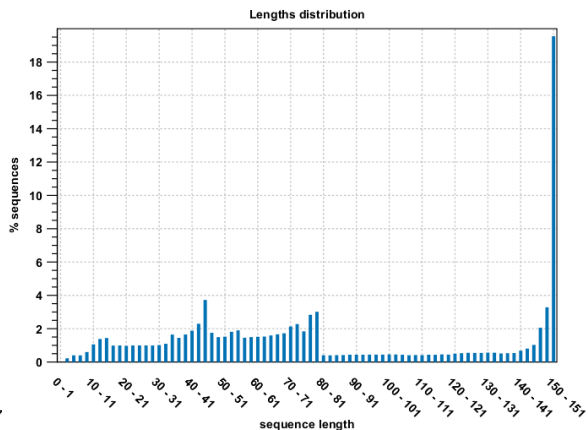

### B

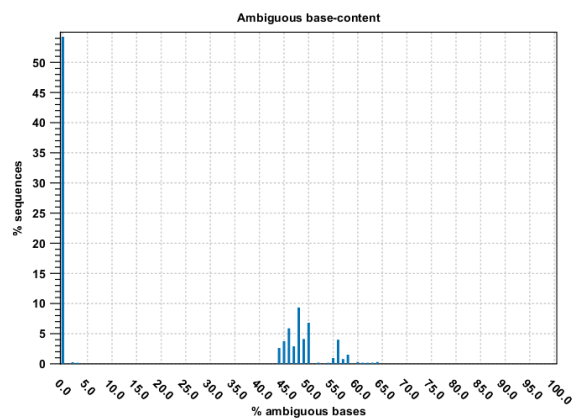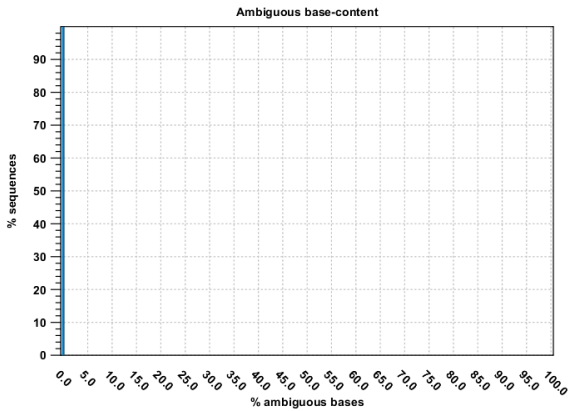

### C

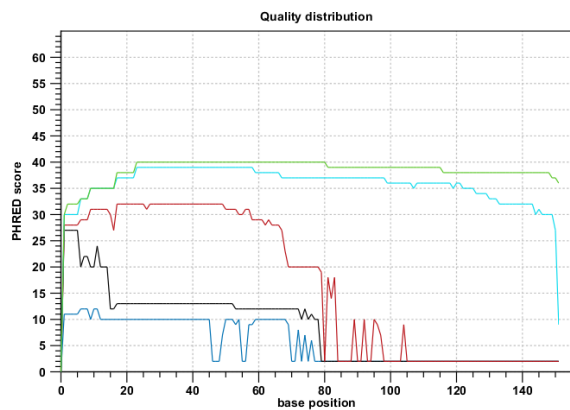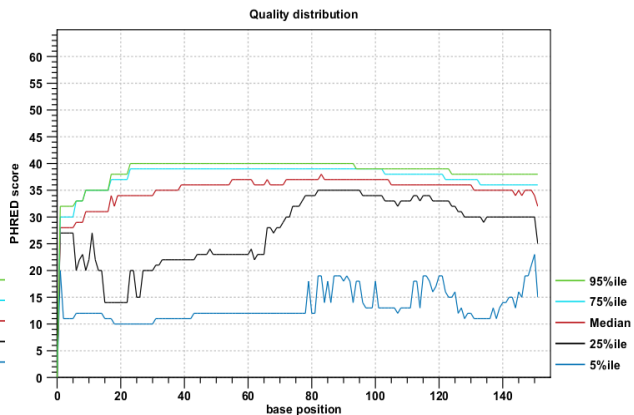

Supplement: MOESM1 [file 9665650]
